# Supplementary material for: Homozygous mutation in the APOA1BP is associated with a lethal infantile leukoencephalopathy
Source: Springer Nature journal article supplement (doi:10.1007/s10048-016-0483-3), 2016-04-28
Supplement: MOESM1 [file 10105096]

**Supplementary Materials:**

**Homozygosity mapping**

Homozygosity mapping was performed with DNA samples of the three patients whose DNA was of sufficient quality (II-2, II-6 and II-7). We used Genechip Human mapping 250K SNP array (Affymetrix, Santa Clara, CA, USA) according to the manufacturer protocol. Briefly, digestion with NspI, ligation of the adaptor, and amplification with a generic primer that recognizes the adaptor sequence were followed by fragmentation, end labeling, and hybridization to the chip in accordance with the manufacturer's instructions. Homozygous regions >2.5 Mb were manually detected.

**Whole exome analysis**

Exonic sequences were enriched in the DNA sample of patient II-7 using SureSelect Human All Exon 50 Mb Kit (Agilent Technologies, Santa Clara, California, USA). Sequences were determined by HiSeq2000 (Illumina, San Diego, California, USA) and 100-bp were read paired-end. Reads alignment and variant calling were performed with DNAnexus software (Palo Alto, California, USA) using the default parameters with the human genome assembly hg19 (GRCh37) as a reference. We removed variants which resided on chromosome X, were called less than X8, were off-target, heterozygous, synonymous, MAF>1% in Exome Aggregation Consortium (ExAC, Cambridge, MA) and MAF>4% at the Hadassah in house database.
